# Supplementary material
Source: PubMed Central journal article supplement (PMC4226370)
Supplement: supp_pp.114.250183_250183suppdata.pdf [file supp_pp.114.250183_250183suppdata.pdf]

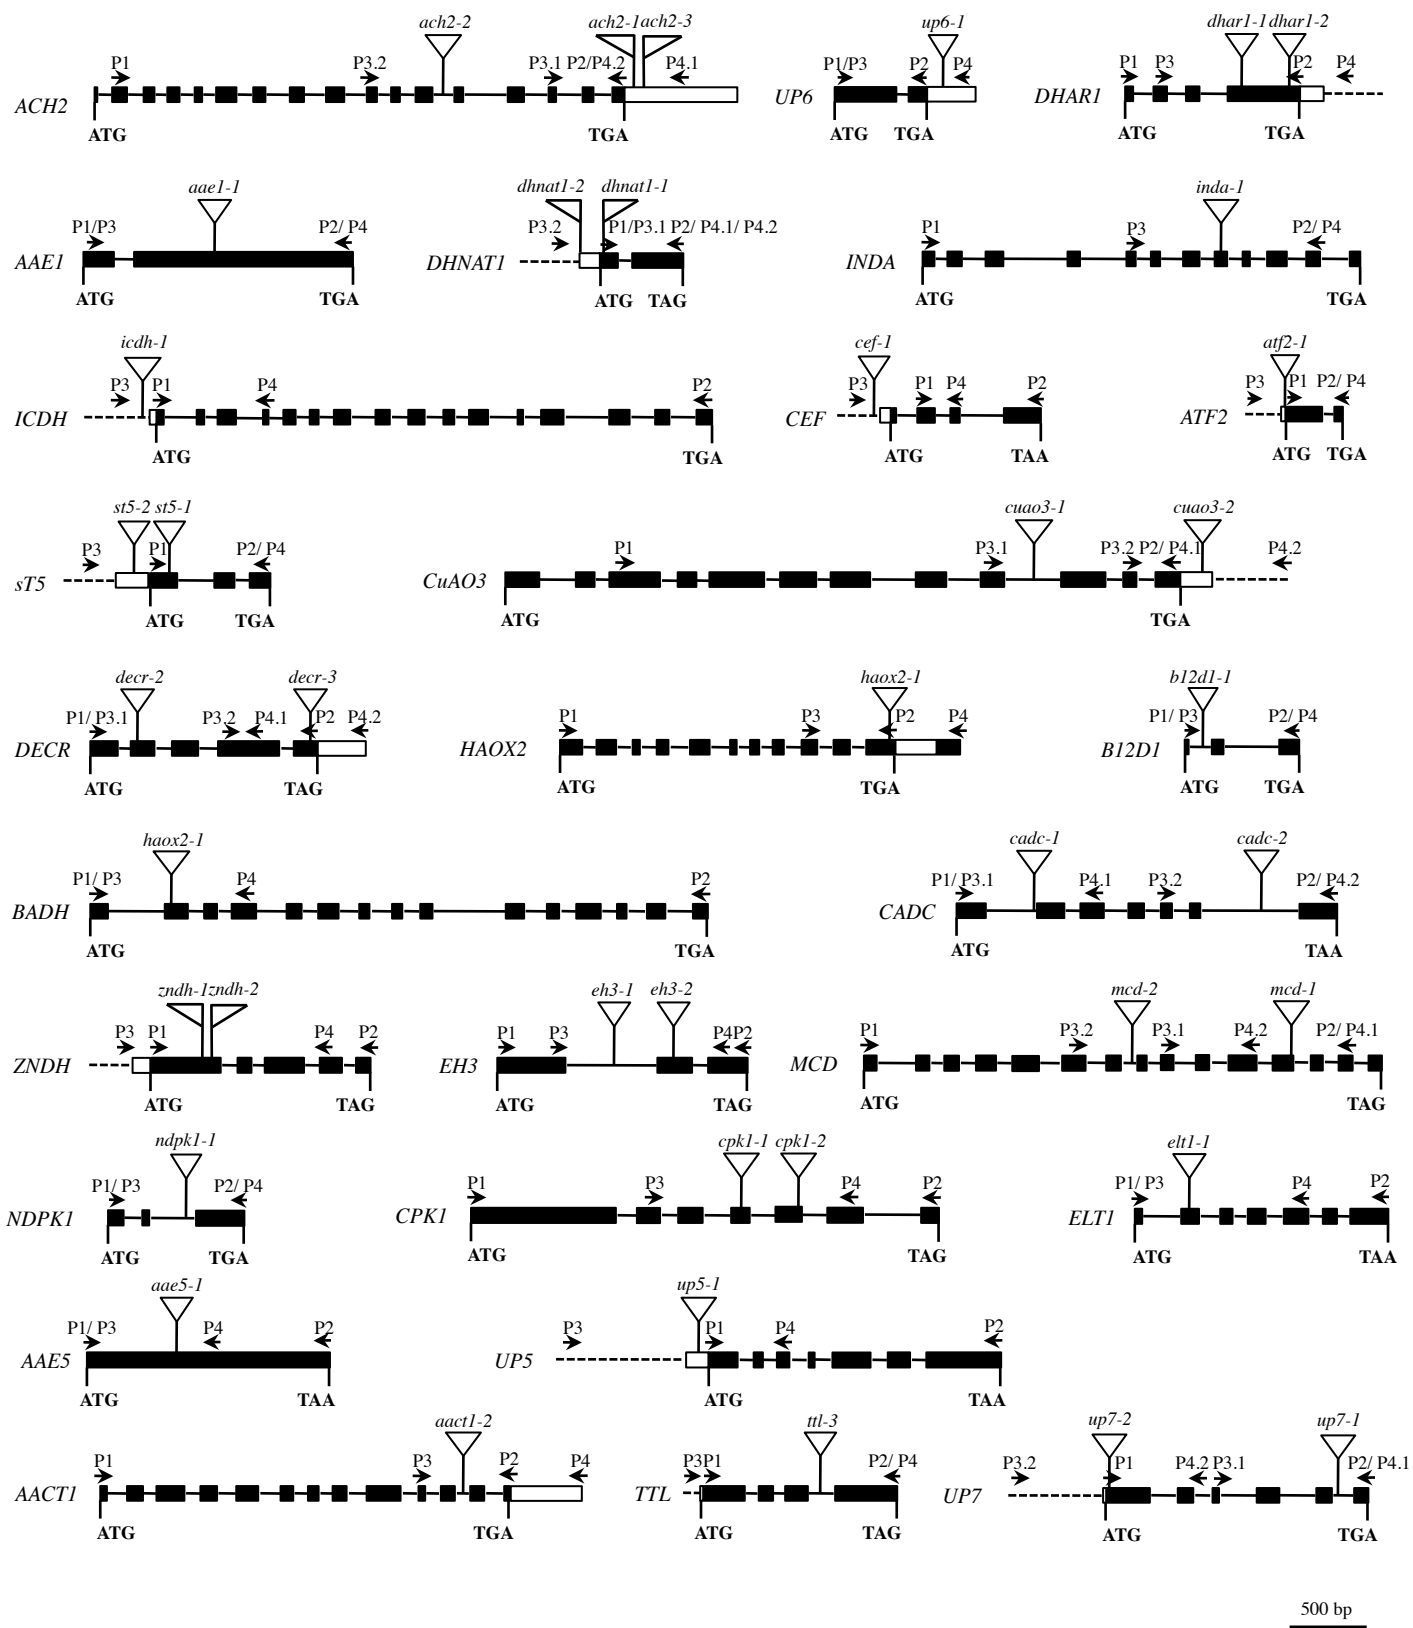

**Supplemental Figure S1.** Schematics of peroxisomal genes analyzed in this study.

Black boxes, coding regions; open boxes, untranslated regions; solid lines, introns; dashed lines, intergenic regions. Positions of the T-DNA insertions are indicated. Primers used for genotyping (P3 and P4) and RT-PCR (P1 and P2) are also indicated.

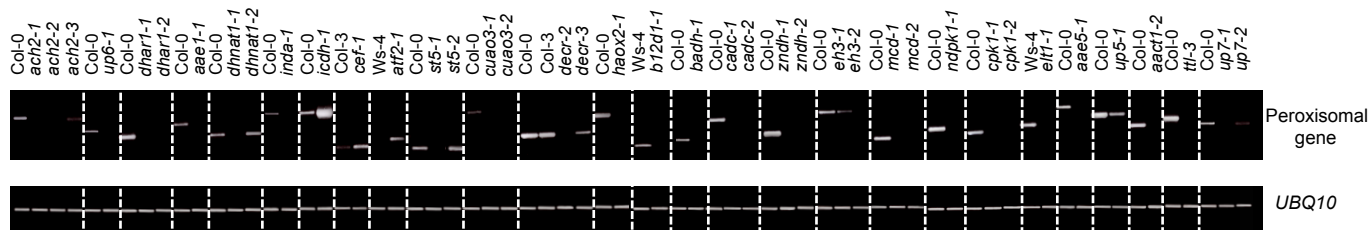

**Supplemental Figure S2.** RT-PCR analysis of 7d mutant seedlings.

Gene-specific primers used for each pair of PCR reaction (35 cycles) are listed in the Supplemental Table S5. *UBQ10* was used to normalize the expression level (25 cycles).

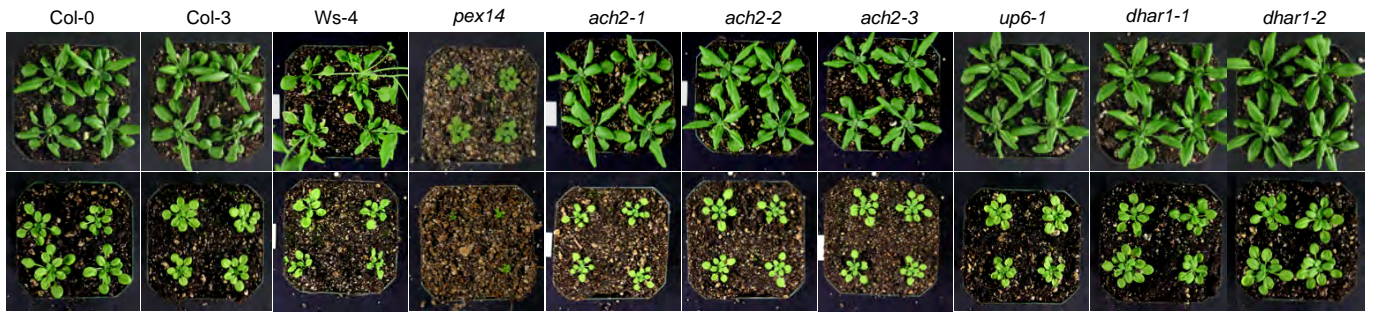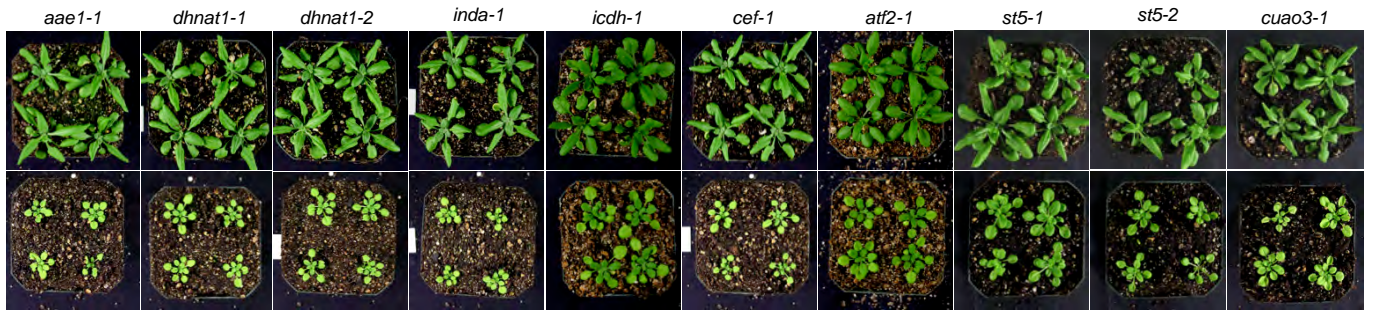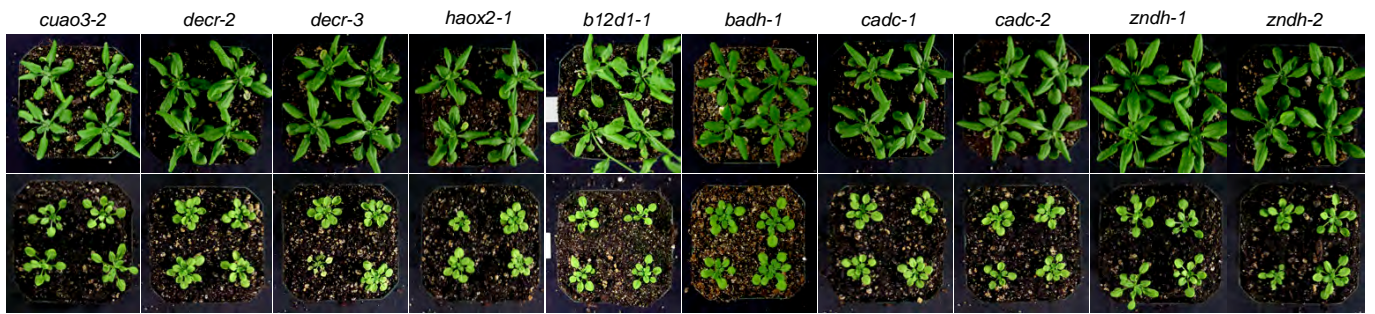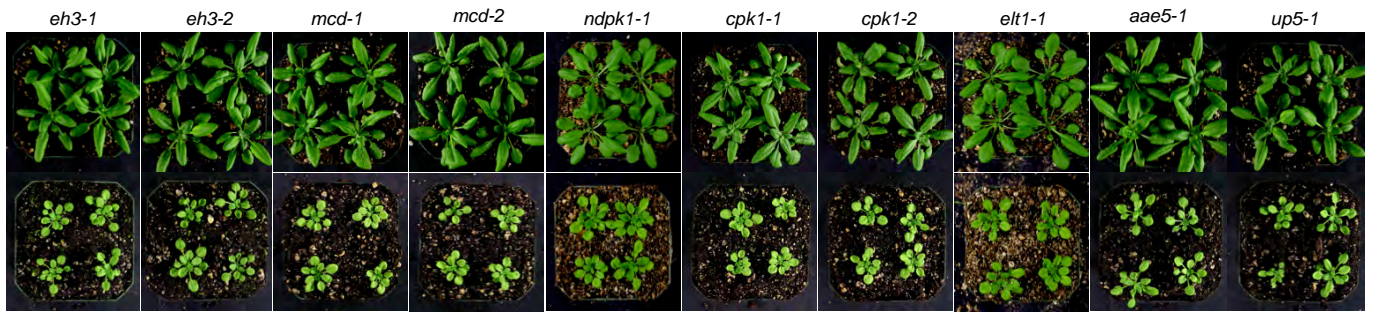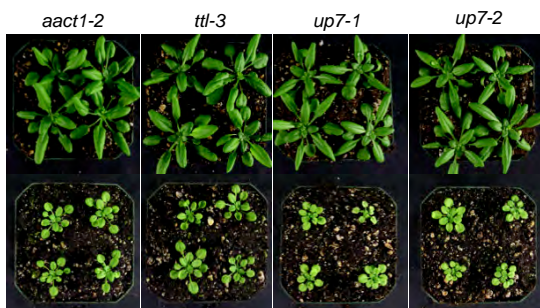

1 cm

**Supplemental Figure S3.** Images of four-week-old plants grown in ambient air (400 ppm CO<sub>2</sub>, top row) or under low CO<sub>2</sub> (80 ppm CO<sub>2</sub>, bottom row).

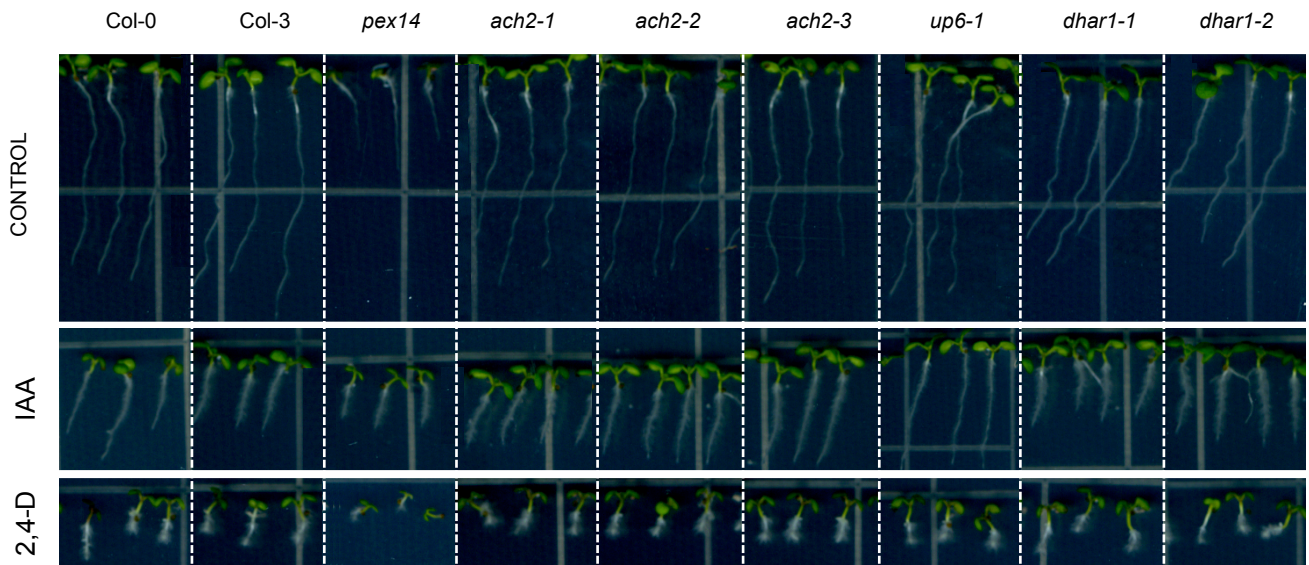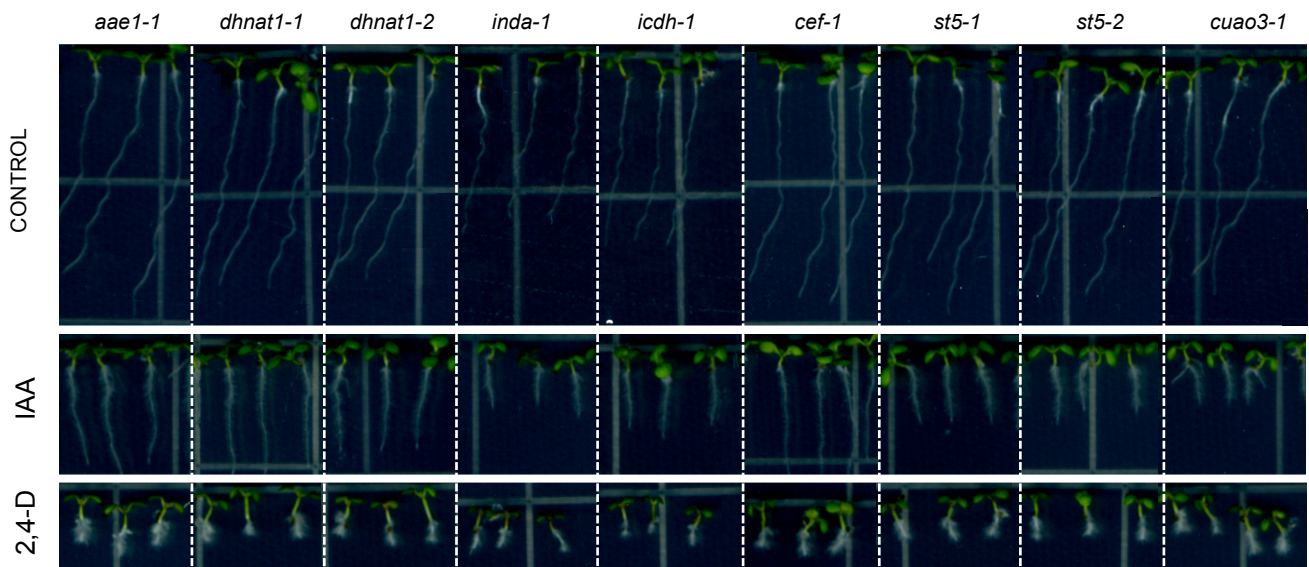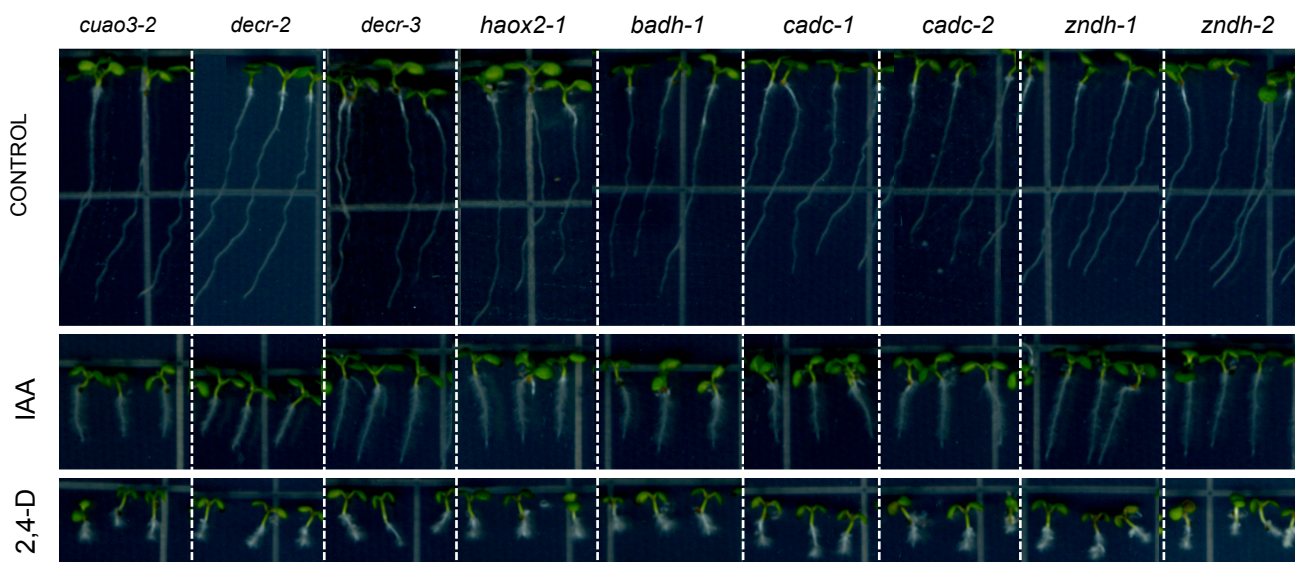

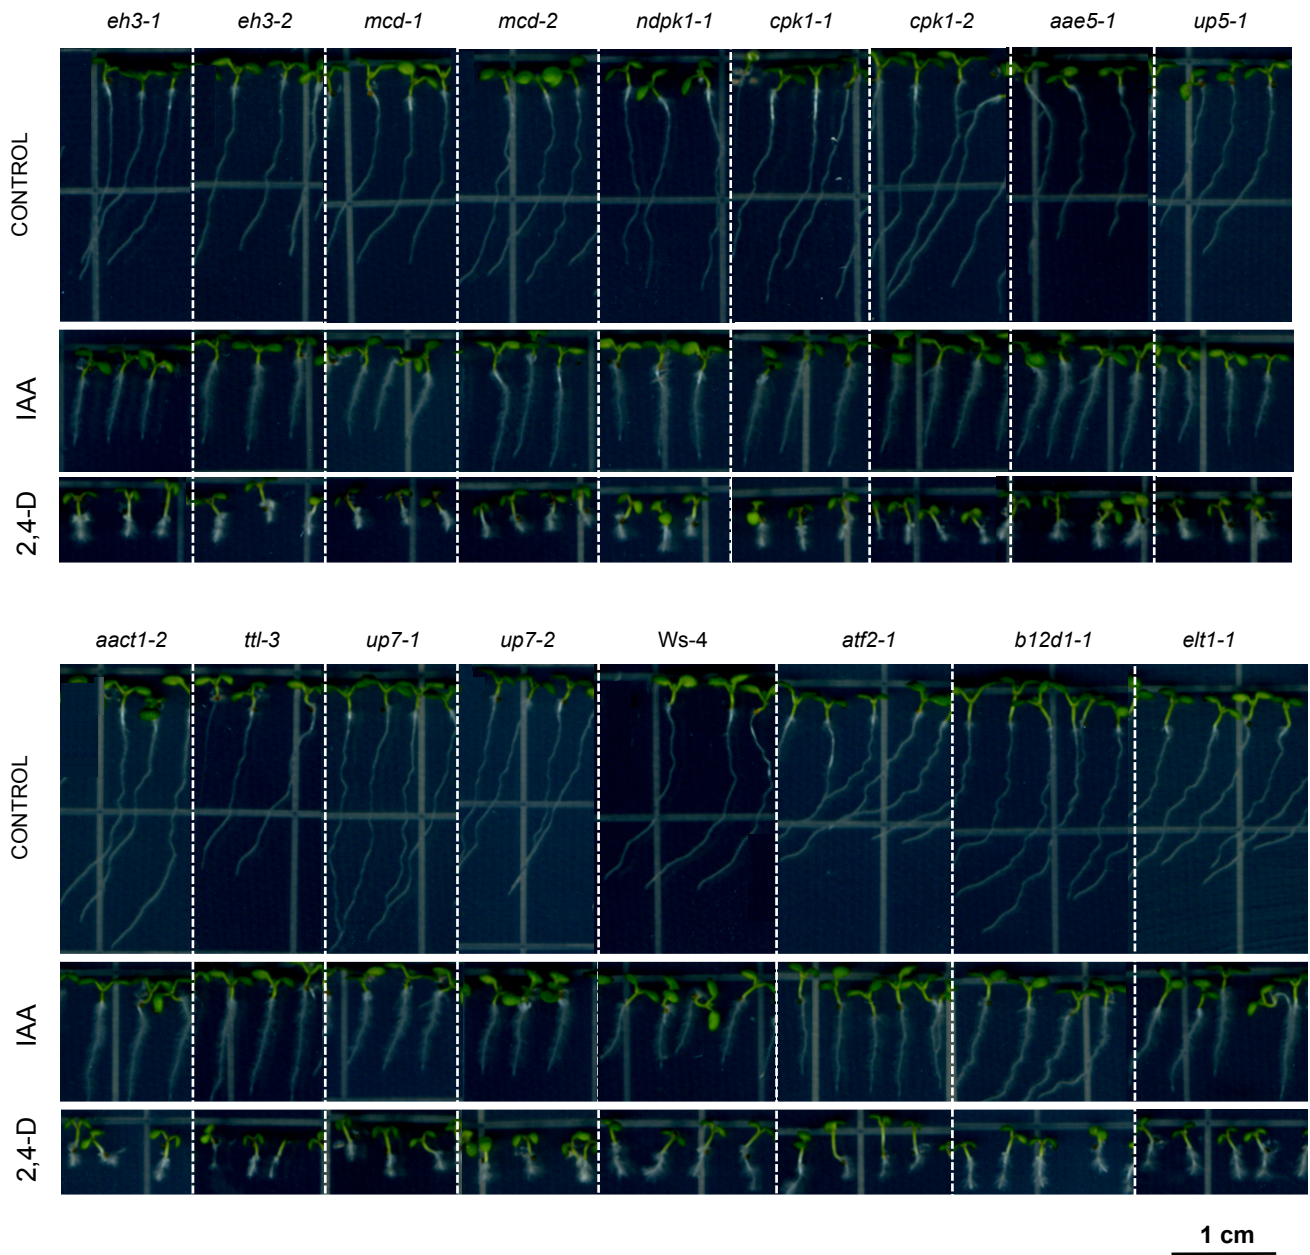

**Supplemental Figure S4.** IAA and 2,4-D responses.

Seven-day-old seedlings grown on 1/2 LS medium supplemented with 0.5% Suc and 100 nM IAA or 2,4-D.

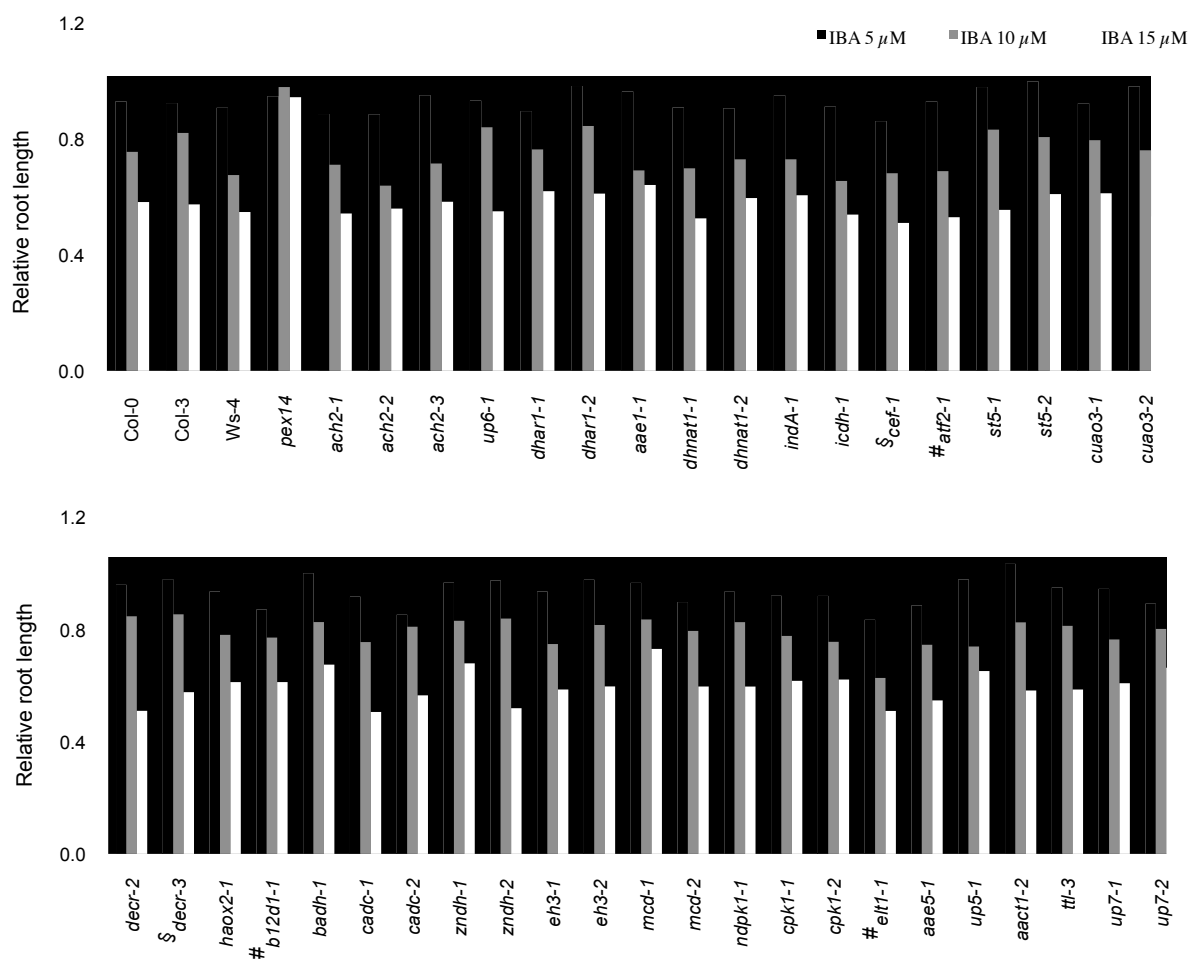

**Supplemental Figure S5.** IBA response of peroxisomal mutants.

Relative root lengths (ratio between root length on IBA vs. without IBA) of 7d seedlings grown on 1/2 LS medium supplemented with 0.5% Suc and 5  $\mu$ M (black bars), 10  $\mu$ M (grey bars) or 15  $\mu$ M (white bars) of IBA are shown. Data represent means  $\pm$  se of three independent experiments. For each experiment,  $n \geq 30$ . Section and hashtag signs indicate mutants in Col-3 and Ws-4 backgrounds respectively. Except for the control mutant *pex14*, none of the mutants display statistically significant reduction in the response to IBA.

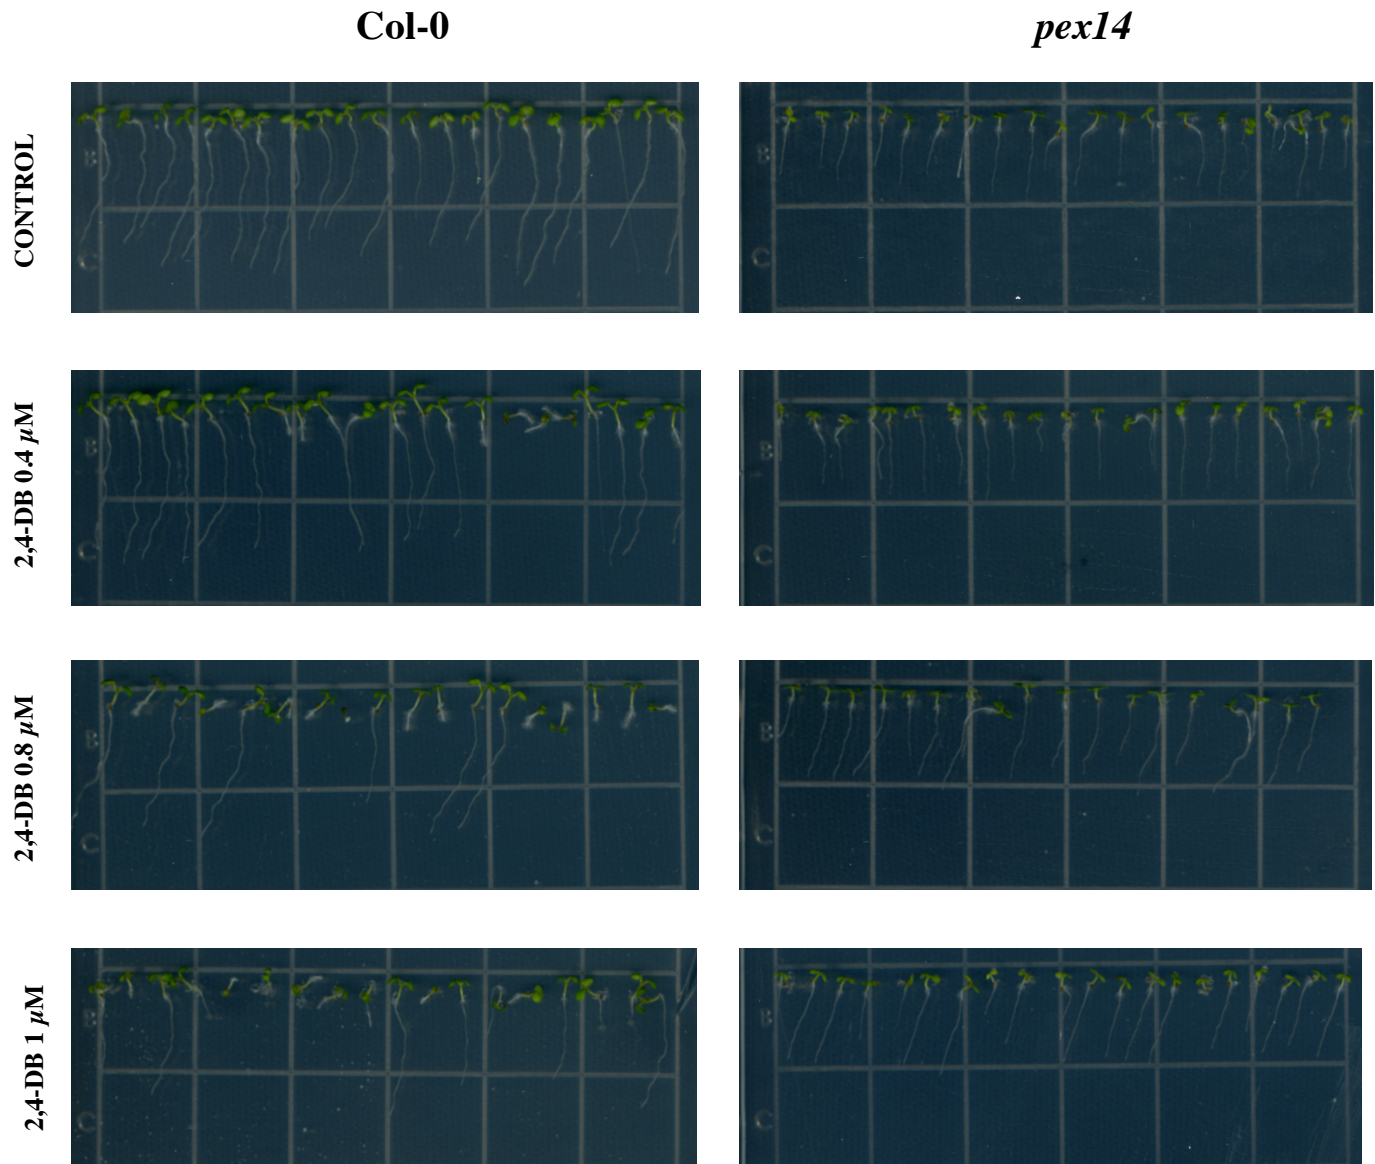

**Supplemental Figure S6.** Responsiveness of Col-0 and *pex14* to 2,4-DB.

Images show 7d seedlings grown on 1/2 LS medium supplemented with 0.5% Suc and 0.4 μM, 0.8 μM or 1 μM 2,4-DB. Scale bar = 1 cm.

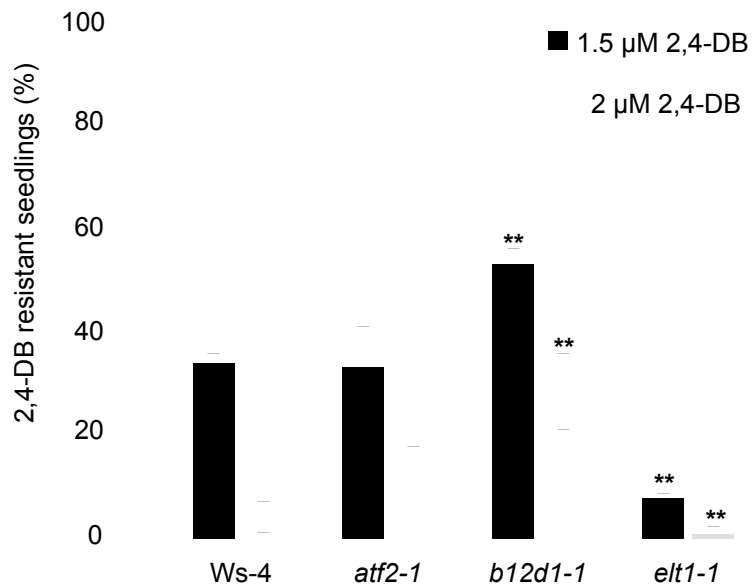

**Supplemental Figure S7.** Responsiveness of mutants in Ws-4 background to 2,4-DB.

Percentage of 7d seedlings with long (resistant) root after growing on 1/2 LS medium supplemented with 0.5% Suc and 1.5 or 2.0 μM of 2,4-DB. Data represent means  $\pm$  se of three independent experiments. For each experiment,  $n \geq 30$ . Asterisks indicate changes significantly different from that in the wild type Ws-4. Student's *t* test, \* $p < 0.01$ , \*\*  $p < 0.001$ .



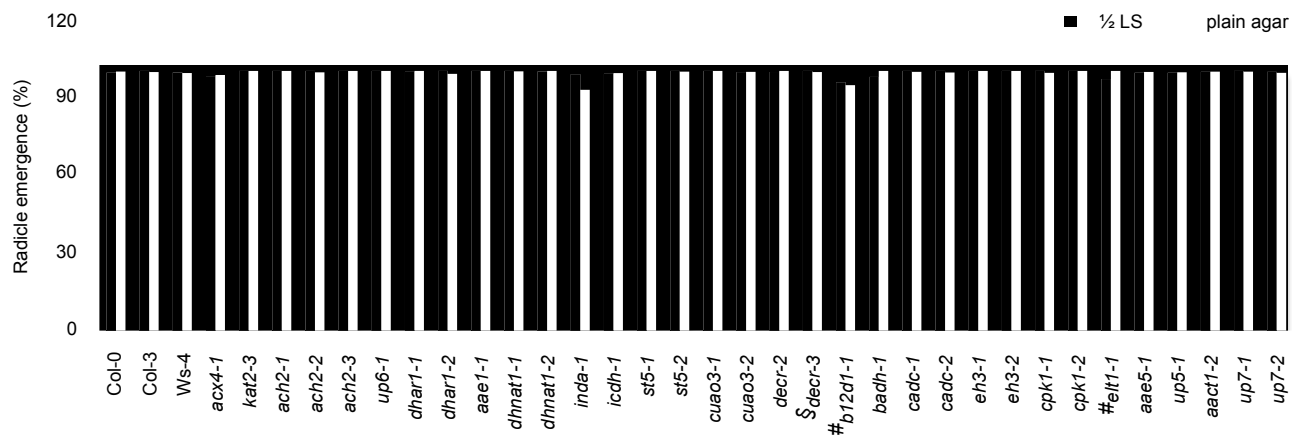

**Supplemental Figure S8.** Seed germination potential of peroxisomal mutants.

Percentage of radicle emergence from seeds grown on plain agar (0.8% agar) or 1/2 LS medium is presented. Data represent means  $\pm$  SE of three independent experiments. For each experiment, n = 50. Section and hashtag signs indicate mutants in Col-3 and Ws-4 backgrounds respectively.

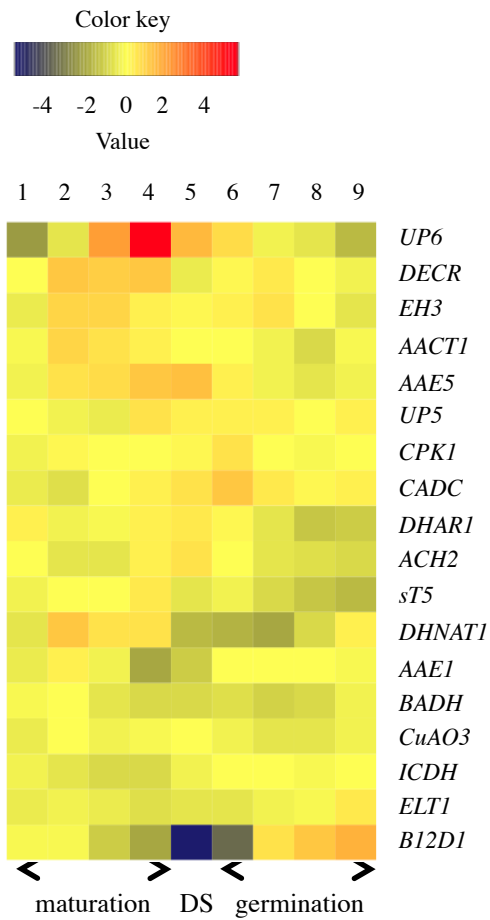

**Supplemental Figure S9.** Heatmap showing relative expression levels of candidate genes in seed maturation and germination.

Log2-normalized expression values during seed maturation and germination were downloaded from BAR expression browser. 1, Seed stage 3 with siliques; 2, Seed stage 5 with siliques; 3, Seed stage 7 without silique; 4, Seed stage 9 without silique; 5, Dry seed (DS); 6, 3-h imbibed seed ; 7, 6-h imbibed seed; 8, 12-h imbibed seed ; 9, 24-h imbibed seed.

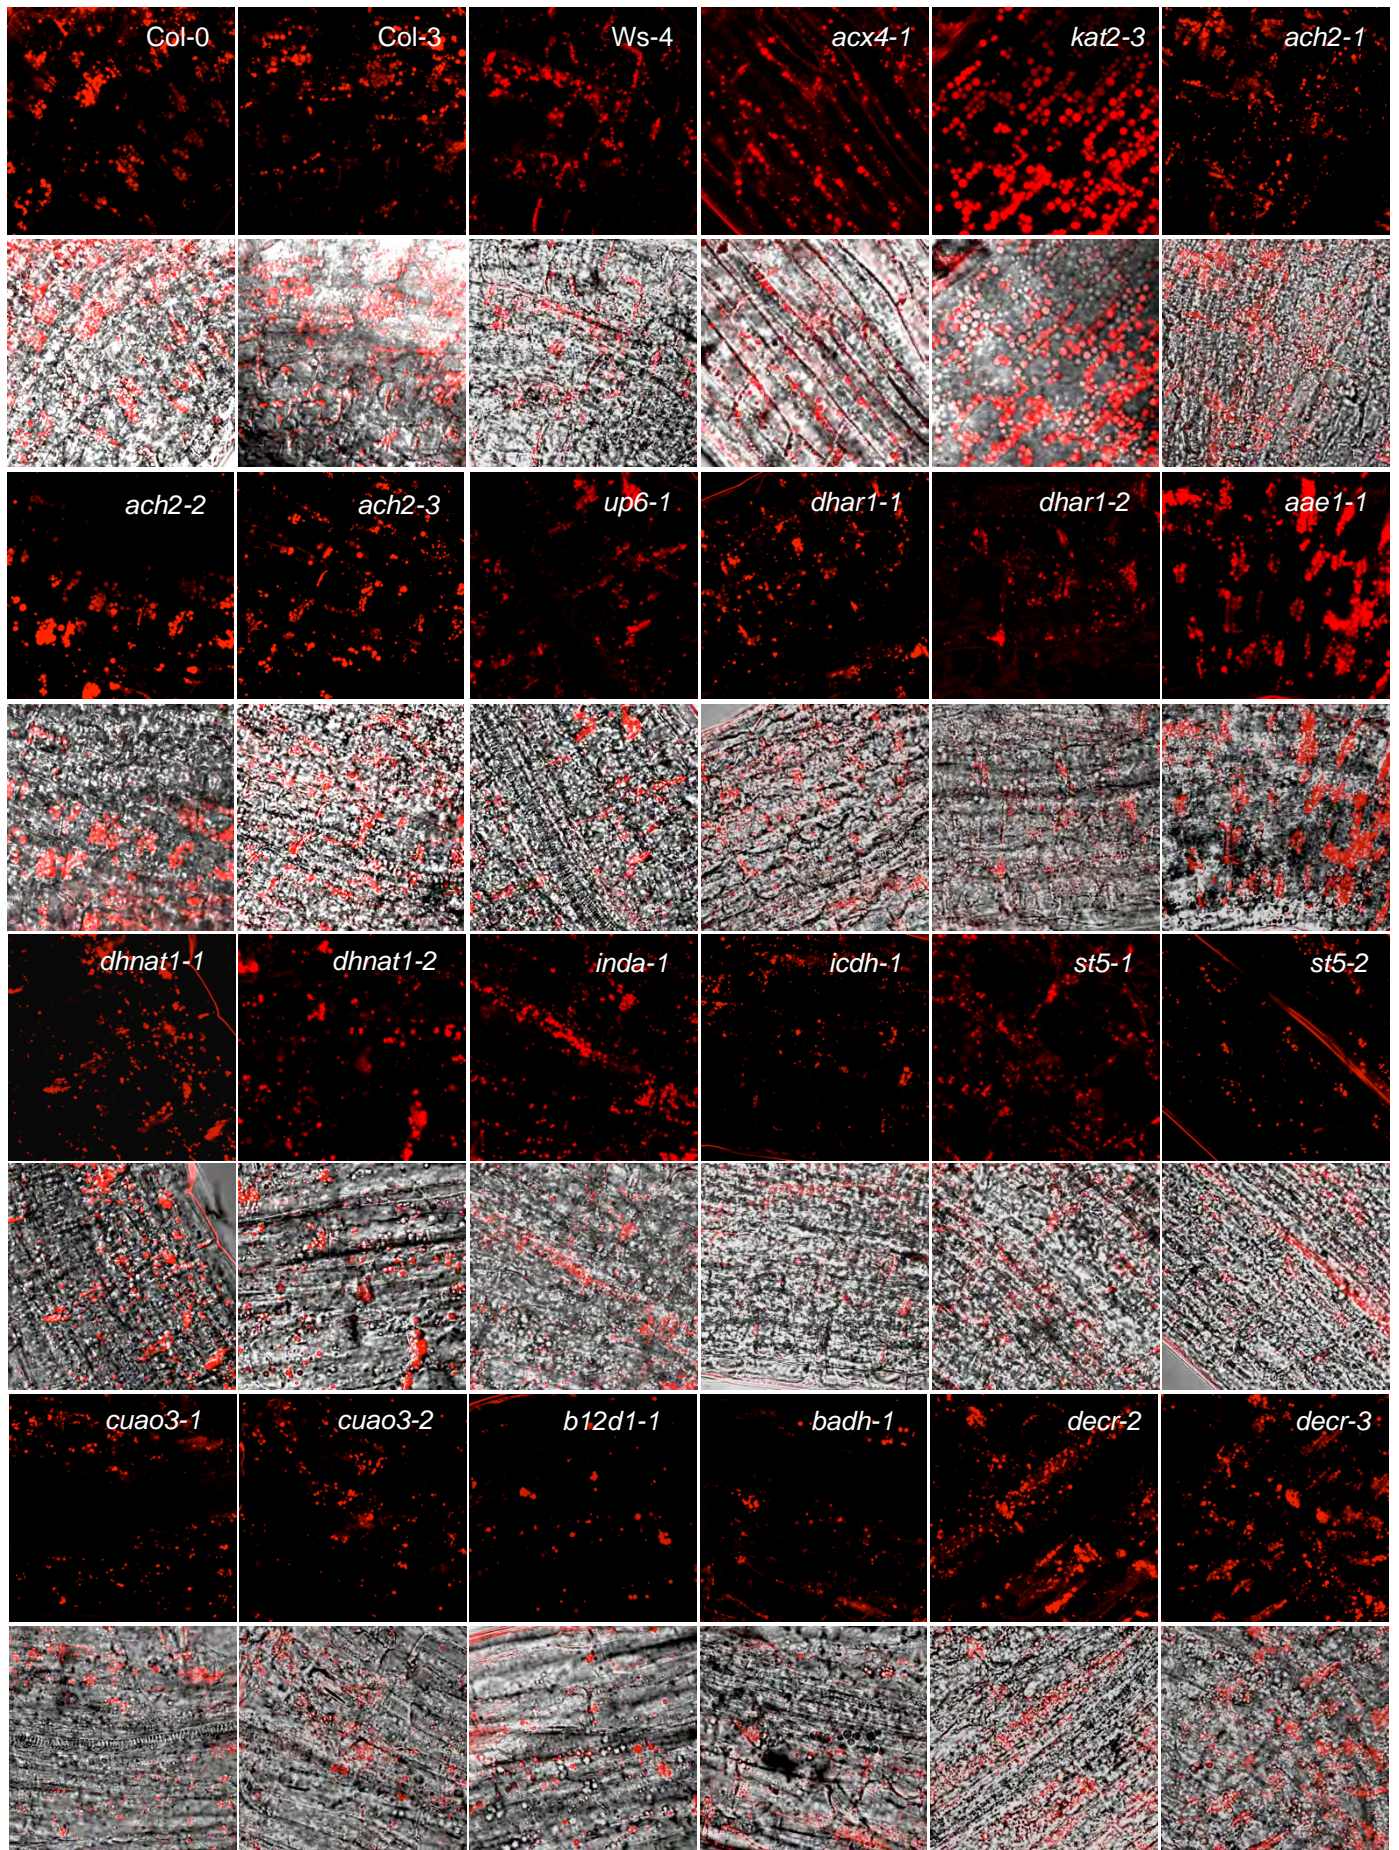

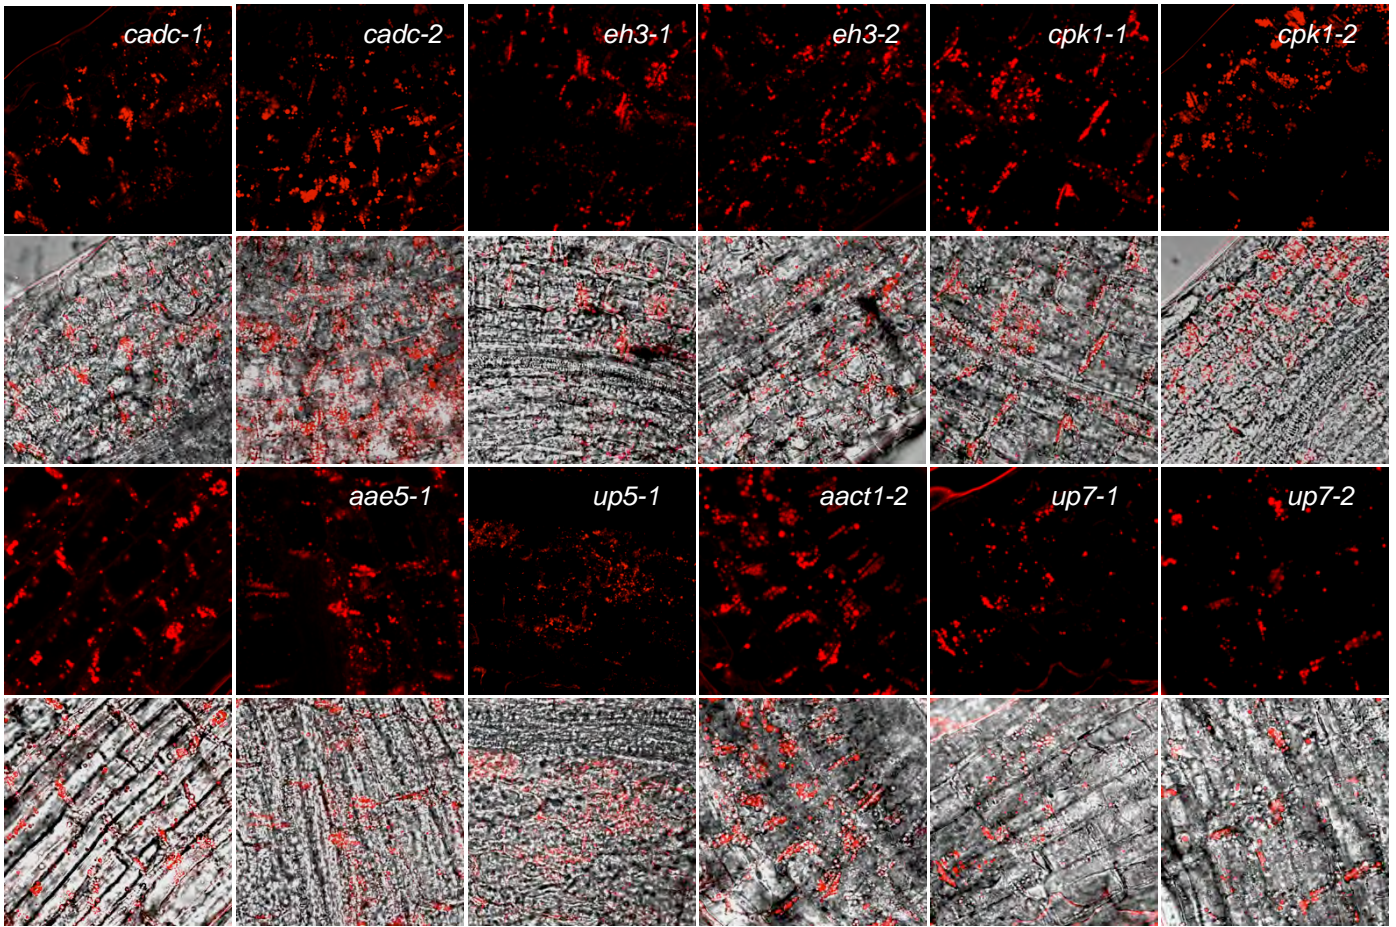

**Supplemental Figure S10.** Visualization of hypocotyl oil bodies in 5d etiolated seedlings. Confocal images are from representative 5d mutant or wild-type (Col-0, Col-3, or Ws-4) seedlings grown on 0.8% agar plates. Top row, Nile red fluorescence; bottom row, bright-field images. Scale bar = 10  $\mu$ m.

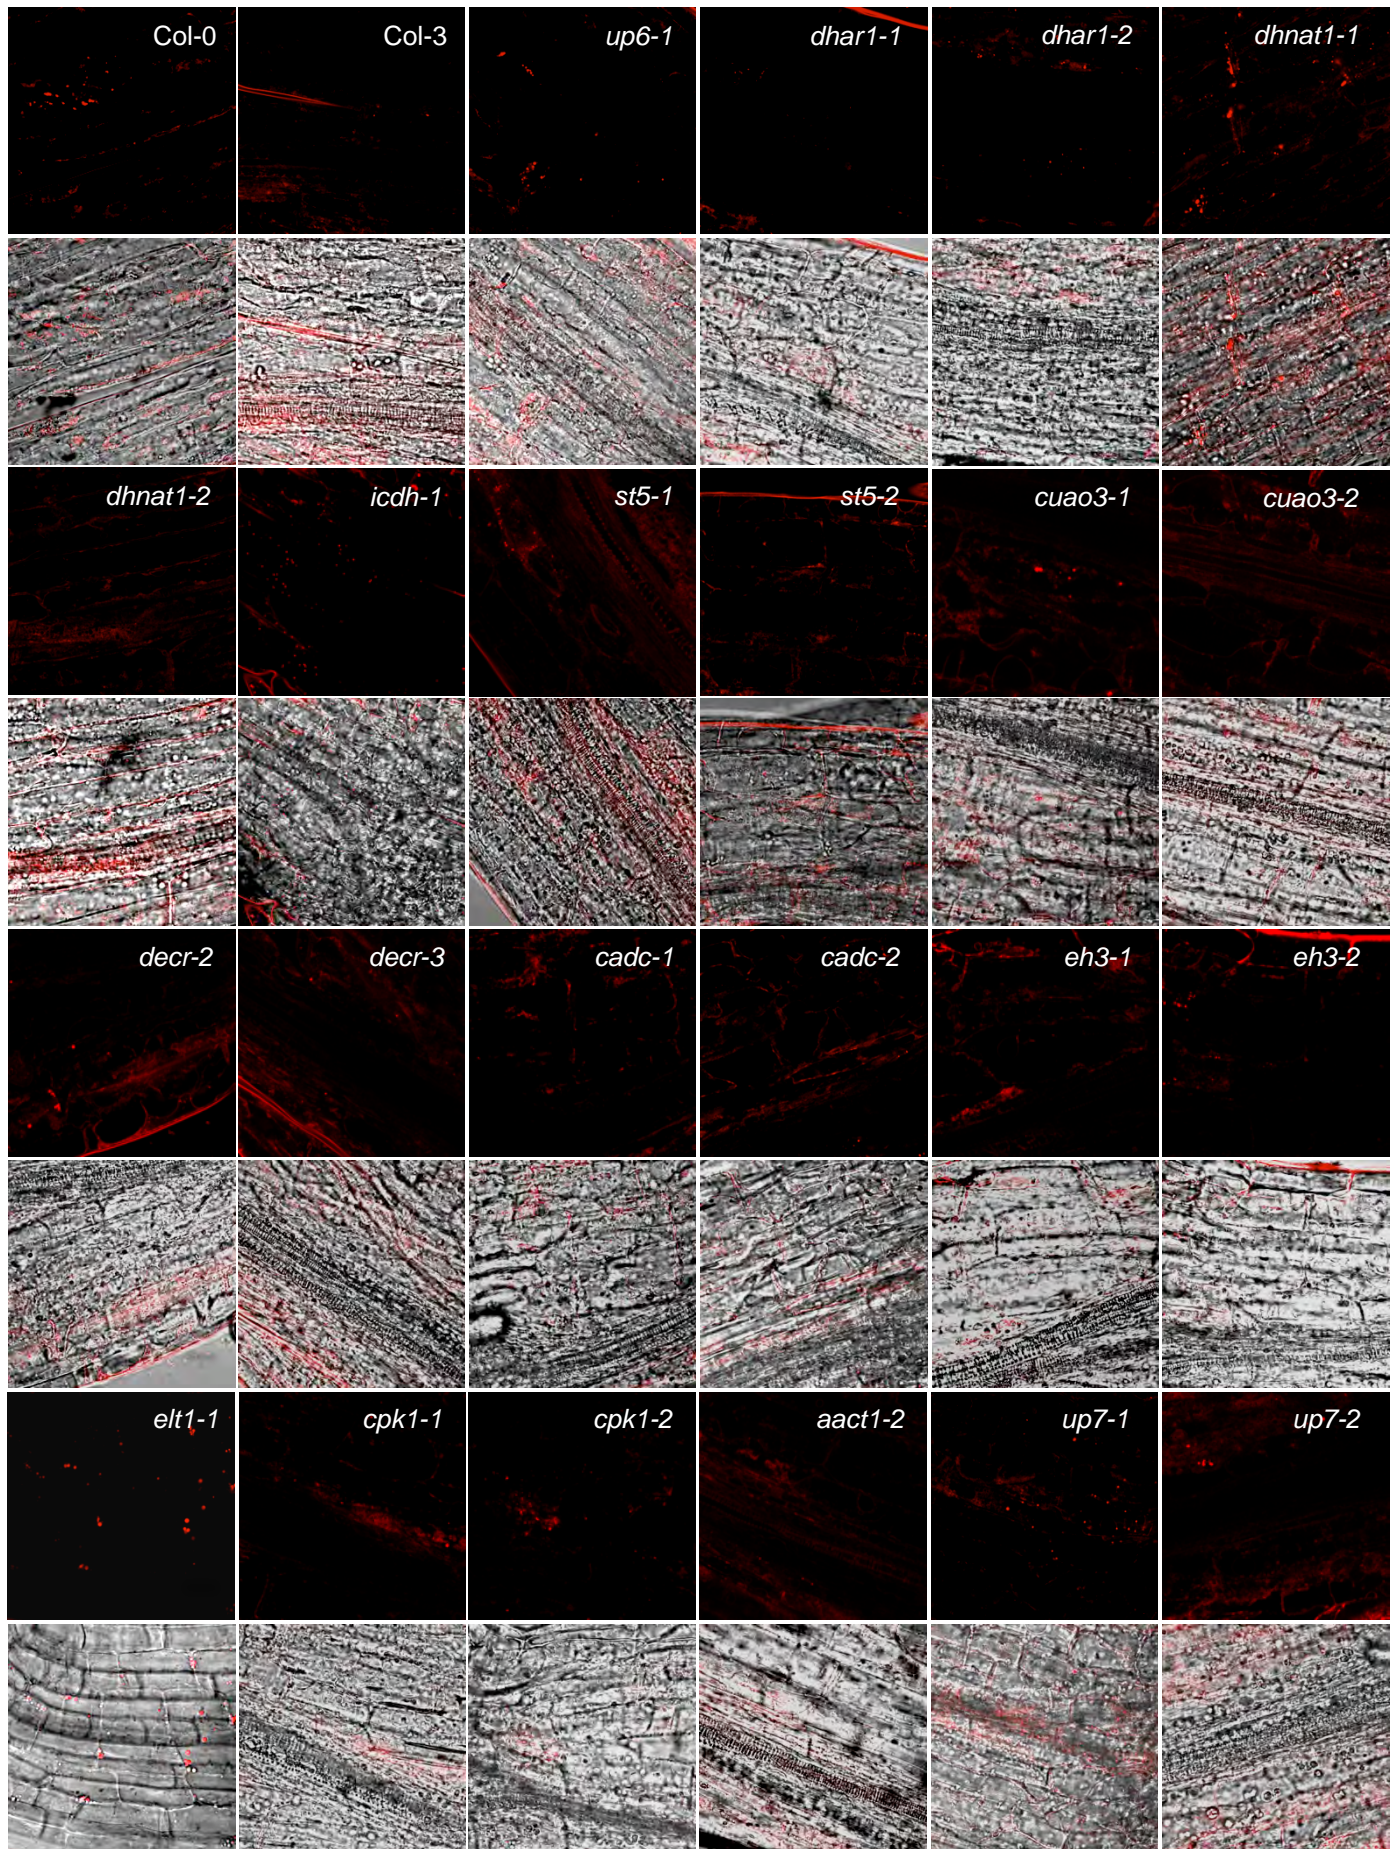

**Supplemental Figure S11.** Visualization of hypocotyl oil bodies in 7d etiolated seedlings. Confocal images of representative seedlings grown on 0.8% agar plates are shown. Top row, Nile red fluorescence; bottom row, merge of Nile red images with bright-field images. Scale bar, 10  $\mu$ M.

**Supplemental Table S1.** Lines without T-DNA insertion and lines for which homozygotes could not be identified.

***Mutants without T-DNA insertion:***

| <b>Gene Locus</b> | <b>Acronym</b> | <b>Annotation</b>                                   | <b>PTS</b>          | <b>Line</b> | <b>Ecotype</b> |
|-------------------|----------------|-----------------------------------------------------|---------------------|-------------|----------------|
| At1g20560         | AAE1           | Acyl-activating enzyme isoform 1                    | SKL                 | SALK_082448 | Col-0          |
|                   |                |                                                     |                     | SALK_082430 | Col-0          |
|                   |                |                                                     |                     | SALK_082437 | Col-0          |
| At2g26230         | Uri            | Uricase                                             | SKL                 | CS812424    | Col-3          |
|                   |                |                                                     |                     | SALK_131436 | Col-0          |
| At5g58220         | TTL1/ ALNS     | Transthyretin-like protein 1/<br>Allantoin synthase | RLx <sub>5</sub> HL | CS875458    | Col-0          |

***List of heterozygous mutants:***

| <b>Gene Locus</b> | <b>Acronym</b> | <b>Annotation</b>                                      | <b>PTS</b> | <b>Line</b>  | <b>Ecotype</b> |
|-------------------|----------------|--------------------------------------------------------|------------|--------------|----------------|
| At1g54340         | ICDH / IDHP1   | NADP-dependent isocitrate<br>dehydrogenase             | SRL        | SALK_039193C | Col-0          |
| At2g26230         | Uri            | Uricase                                                | SKL        | SALK_131438  | Col-0          |
| At3g02360         | 6PGDH          | Phosphogluconate dehydrogenase                         | SKI        | SALK_071687  | Col-0          |
|                   |                |                                                        |            | GK_692E09    | Col-0          |
| At3g48140         | B12D1          | Senescence-associated protein/<br>B12D-related protein |            | SALK_006284C | Col-0          |
| At4g39660         | AGT2           | Alanine: glyoxylate<br>aminotransferase 2              | SRL        | SALK_003381  | Col-0          |
|                   |                |                                                        |            | GK_325A04    | Col-0          |

**Supplemental Table S2.** Identification of peroxisomal proteins analyzed in this study from previous proteomic studies.

| Gene Locus | Acronym     | Annotation                                                                | Etiolated seedlings |                  | Greenings cotyledons | Cell culture      | Green Leaves        |
|------------|-------------|---------------------------------------------------------------------------|---------------------|------------------|----------------------|-------------------|---------------------|
|            |             |                                                                           | Fukao et al, 2003   | Quan et al, 2013 | Fukao et al., 2002   | Eubel et al, 2008 | Reumann et al, 2009 |
| At1g01710  | ACH2        | Acyl-CoA thioesterase 2                                                   |                     | X                |                      | X                 | X                   |
| At1g16730  | UP6         | Unknown protein 6                                                         |                     | X                |                      |                   | X                   |
| At1g19570  | DHAR1       | Dehydroascorbate reductase                                                |                     |                  |                      |                   | X                   |
| At1g20560  | AAE1        | Acyl-activating enzyme isoform 1                                          |                     |                  | X                    | X                 | X                   |
| At1g48320  | DHNAT1/sT1  | DHNA-CoA thioesterase 1/ Small thioesterase 1                             |                     | X                |                      |                   | X                   |
| At1g50510  | INDA        | Indigoidine synthase A                                                    |                     | X                |                      | X                 | X                   |
| At1g54340  | ICDH        | NADP-dependent isocitrate deshydrogenase                                  | X                   | X                |                      | X                 | X                   |
| At1g64850  | CEF         | Calcium binding EF-hand                                                   |                     |                  |                      |                   | X                   |
| At1g77540  | ATF2        | Acetyltransferase 2                                                       |                     | X                |                      |                   | X                   |
| At2g29590  | sT5         | Small thioesterase 5                                                      |                     |                  |                      |                   | X                   |
| At2g42490  | CuAO3       | Copper amine oxidase 3                                                    |                     | X                |                      | X                 | X                   |
| At3g12800  | SDRb / DECR | Short-chain dehydrogenase/ reductase isoform b/ 2,4-dienoyl-CoA reductase |                     | X                |                      | X                 | X                   |
| At3g14150  | HAOX2       | Hydroxy-acid oxidase isoform 2                                            |                     |                  |                      |                   | X                   |
| At3g48140  | B12D1       | B12D-related protein                                                      |                     |                  |                      |                   | X                   |
| At3g48170  | BADH        | Aldehyde deshydrogenase                                                   |                     | X                |                      | X                 | X                   |
| At3g55640  | CADC        | Ca <sup>2+</sup> -dependent carrier                                       |                     | X                |                      | X                 | X                   |
| At3g56460  | ZnDH        | Zinc-binding dehydrogenase                                                |                     | X                |                      | X                 | X                   |
| At4g02340  | EH3         | Epoxide hydrolase isoform 3                                               |                     |                  |                      | X                 | X                   |
| At4g04320  | MCD         | Malonyl-CoA decarboxylase                                                 |                     |                  |                      | X                 | X                   |
| At4g09320  | NDPK1       | Nucleoside diphosphate kinase type 1                                      |                     | X                |                      |                   | X                   |
| At5g04870  | CPK1        | Calcium dependent protein kinase 1                                        |                     |                  |                      |                   |                     |
| At5g11910  | ELT1        | Esterase/ lipase/ thioesterase family isoform 1                           |                     |                  |                      |                   | X                   |
| At5g16370  | AAE5        | Acyl-activating enzyme 5                                                  |                     | X                | X                    | X                 | X                   |
| At5g44250  | UP5         | Unknown protein 5                                                         |                     |                  |                      |                   | X                   |
| At5g47720  | AACT1       | Acetoacetyl-CoA thiolase 1.3                                              |                     | X                |                      |                   |                     |
| At5g58220  | TTL         | Transthyretin-like protein                                                |                     |                  |                      | X                 | X                   |
| At5g65400  | UP7         | Serine Hydrolase 1                                                        |                     |                  |                      |                   | X                   |



**Supplemental Table S3.** Measurements for the sucrose dependence assays.

Relative hypocotyl (dark) and root (light) lengths (-Suc versus +Suc) of 7d seedlings grown on 1/2 LS medium supplemented with or without Suc. Data represent means  $\pm$  SE of three independent experiments. For each experiment, n = 50.

|           |                 | DARK |       |              | LIGHT |       |              |
|-----------|-----------------|------|-------|--------------|-------|-------|--------------|
|           |                 | mean | SE    | Student test | mean  | SE    | Student test |
|           | Col0            | 0.85 | 0.027 | -            | 0.84  | 0.056 | -            |
|           | Col3            | 0.90 | 0.045 | -            | 0.88  | 0.038 | -            |
|           | Ws4             | 0.80 | 0.024 | -            | 0.94  | 0.039 | -            |
|           | <i>pex14</i>    | 0.22 | 0.030 | 2.70113E-21  | 0.14  | 0.019 | 5.06518E-28  |
| At1g01710 | <i>ach2-1</i>   | 0.81 | 0.046 | 0.099780022  | 0.85  | 0.054 | 0.781488227  |
|           | <i>ach2-2</i>   | 0.88 | 0.066 | 0.14394992   | 0.95  | 0.036 | 0.000733983  |
|           | <i>ach2-3</i>   | 0.91 | 0.034 | 0.000904445  | 0.83  | 0.042 | 0.628189991  |
| At1g16730 | <i>up6-1</i>    | 0.94 | 0.078 | 0.004495419  | 0.89  | 0.039 | 0.163499548  |
| At1g19570 | <i>dhar1-1</i>  | 0.87 | 0.014 | 0.088216133  | 0.88  | 0.021 | 0.232105387  |
|           | <i>dhar1-2</i>  | 0.88 | 0.017 | 0.06028705   | 0.80  | 0.049 | 0.267459055  |
| At1g20560 | <i>aae1-1</i>   | 0.97 | 0.056 | 6.87515E-05  | 0.85  | 0.052 | 0.791591679  |
| At1g48320 | <i>dhnat1-1</i> | 0.81 | 0.060 | 0.121543694  | 0.82  | 0.060 | 0.538924628  |
|           | <i>dhnat1-2</i> | 0.81 | 0.039 | 0.327294242  | 0.82  | 0.029 | 0.438858416  |
| At1g50510 | <i>inda-1</i>   | 0.83 | 0.027 | 0.184775749  | 0.76  | 0.010 | 0.0139893    |
| At1g54340 | <i>icdh-1</i>   | 0.74 | 0.037 | 0.000153897  | 0.85  | 0.045 | 0.941075033  |
| At1g64850 | <i>cef-1</i>    | 0.83 | 0.028 | 0.152712563  | 0.83  | 0.077 | 0.33154256   |
| At1g77540 | <i>atf2-1</i>   | 0.84 | 0.013 | 0.223973757  | 0.78  | 0.069 | 0.010691507  |
| At2g29590 | <i>st5-1</i>    | 0.98 | 0.063 | 5.76434E-05  | 0.80  | 0.096 | 0.260361059  |
|           | <i>st5-2</i>    | 0.94 | 0.025 | 3.03002E-05  | 0.96  | 0.086 | 0.003391833  |
| At2g42490 | <i>cuao-1</i>   | 0.86 | 0.037 | 0.415983857  | 0.90  | 0.041 | 0.146159872  |
|           | <i>cuao-2</i>   | 0.92 | 0.034 | 0.009217858  | 0.82  | 0.017 | 0.595812737  |
| At3g12800 | <i>decr-2</i>   | 1.02 | 0.017 | 1.65719E-07  | 0.86  | 0.117 | 0.672608646  |
|           | <i>decr-3</i>   | 1.04 | 0.022 | 0.013135616  | 0.90  | 0.065 | 0.672542951  |
| At3g14150 | <i>haox1-1</i>  | 0.95 | 0.030 | 2.211E-05    | 0.91  | 0.057 | 0.03432197   |
| At3g48140 | <i>b12d1-1</i>  | 0.79 | 0.014 | 0.737902312  | 0.89  | 0.065 | 0.252919227  |
| At3g48170 | <i>badh-1</i>   | 0.86 | 0.116 | 0.692022112  | 0.79  | 0.058 | 0.086638398  |
| At3g55640 | <i>cadc-1</i>   | 1.00 | 0.021 | 1.6556E-07   | 0.90  | 0.034 | 0.064334466  |
|           | <i>cadc-2</i>   | 0.80 | 0.066 | 0.0520033    | 1.05  | 0.033 | 3.16612E-07  |
| At3g56460 | <i>zndh-1</i>   | 0.97 | 0.027 | 3.21522E-06  | 0.90  | 0.066 | 0.09468511   |
|           | <i>zndh-2</i>   | 0.99 | 0.050 | 6.47175E-06  | 0.89  | 0.012 | 0.309884302  |
| At4g02340 | <i>eh3-1</i>    | 0.92 | 0.037 | 0.00082387   | 0.89  | 0.107 | 0.175933598  |
|           | <i>eh3-2</i>    | 0.96 | 0.054 | 0.000134123  | 0.89  | 0.087 | 0.198442622  |
| At4g04320 | <i>mcd-1</i>    | 1.01 | 0.168 | 0.009532992  | 0.90  | 0.160 | 0.236621439  |
|           | <i>mcd-2</i>    | 0.86 | 0.111 | 0.797343451  | 0.90  | 0.091 | 0.10510667   |
| At4g09320 | <i>ndpk-1</i>   | 0.81 | 0.057 | 0.150957756  | 0.89  | 0.028 | 0.287200891  |
| At5g04870 | <i>cpk1-1</i>   | 0.94 | 0.076 | 0.005890754  | 0.85  | 0.073 | 0.784468002  |
|           | <i>cpk1-2</i>   | 0.98 | 0.063 | 8.16885E-05  | 0.83  | 0.071 | 0.693940174  |
| At5g11910 | <i>elt1-1</i>   | 0.89 | 0.053 | 0.067961956  | 0.91  | 0.039 | 0.324510445  |
| At5g16370 | <i>aae5-1</i>   | 0.95 | 0.067 | 0.003761092  | 0.88  | 0.024 | 0.290013306  |
| At5g44250 | <i>up5-1</i>    | 0.79 | 0.047 | 0.00818022   | 0.86  | 0.054 | 0.49299674   |
| At5g47720 | <i>aact1-2</i>  | 0.81 | 0.099 | 0.355669223  | 0.89  | 0.052 | 0.233434107  |
| At5g58220 | <i>tll-3</i>    | 0.99 | 0.028 | 5.63043E-07  | 0.94  | 0.038 | 0.009693737  |
| At5g65400 | <i>up7-1</i>    | 0.89 | 0.103 | 0.266844759  | 0.76  | 0.024 | 0.013005102  |
|           | <i>up7-2</i>    | 0.86 | 0.092 | 0.671106101  | 0.86  | 0.040 | 0.713764227  |

**Supplemental Table S4.** Log2 expression values downloaded from BAR expression browser to generate heatmap shown in Supplemental Figure S8

| Locus     | Annotation                                      | Acronym | 1    | 2    | 3    | 4    | 5    | 6    | 7    | 8    | 9    |
|-----------|-------------------------------------------------|---------|------|------|------|------|------|------|------|------|------|
| At1g16730 | Unknown protein 6                               | UP6     | -2.3 | -0.4 | 2.3  | 5.9  | 1.7  | 0.9  | -0.2 | -0.5 | -1.6 |
| At3g12800 | Short-chain dehydrogenase/ reductase isoform b  | DECR    | 0.1  | 1.4  | 1.2  | 1.3  | -0.3 | 0.3  | 0.6  | 0.2  | -0.1 |
| At4g02340 | Epoxide hydrolase isoform 3                     | EH3     | -0.3 | 1    | 1.1  | 0.5  | 0.3  | 0.5  | 0.7  | 0.1  | -0.4 |
| At5g47720 | Acetoacetyl-CoA thiolase 1.3                    | AACT1   | 0    | 1.1  | 0.8  | 0.4  | 0.2  | 0.1  | -0.1 | -0.7 | 0    |
| At5g16370 | Acyl-activating enzyme 5                        | AAE5    | -0.1 | 0.8  | 0.9  | 1.4  | 1.6  | 0.5  | -0.1 | -0.4 | -0.2 |
| At5g44250 | Unknown protein 5                               | UP5     | 0.2  | -0.2 | -0.3 | 0.7  | 0.5  | 0.5  | 0.5  | 0.2  | 0.5  |
| At5g04870 | Calcium dependent protein kinase 1              | CPK1    | -0.1 | 0.3  | 0.1  | 0.1  | 0.3  | 0.7  | 0.1  | 0    | 0.2  |
| At3g55640 | Ca <sup>2+</sup> -dependent carrier             | CADC    | -0.3 | -0.6 | 0.2  | 0.5  | 0.7  | 1.4  | 0.6  | 0.3  | 0.4  |
| At1g19570 | Dehydroascorbate reductase                      | DHAR1   | 0.4  | -0.1 | 0    | 0.4  | 0.6  | 0.3  | -0.5 | -1.2 | -1.1 |
| At1g01710 | Acyl-CoA thioesterase 2                         | ACH2    | 0.1  | -0.4 | -0.5 | 0.4  | 0.7  | 0.2  | -0.4 | -0.6 | -0.8 |
| At2g29590 | Small thioesterase 5                            | sT5     | -0.1 | 0.1  | 0.2  | 0.6  | -0.4 | -0.1 | -0.7 | -1.2 | -1.6 |
| At1g48320 | DHNA-CoA thioesterase 1/ Small thioesterase 1   | DHNAT1  | -0.5 | 1.3  | 0.8  | 0.7  | -1.5 | -1.7 | -2   | -0.8 | 0.4  |
| At1g20560 | Acyl-activating enzyme isoform 1                | AAE1    | -0.3 | 0.5  | -0.1 | -2   | -1   | 0.1  | 0.2  | 0.1  | 0    |
| At3g48170 | Aldehyde deshydrogenase                         | BADH    | 0    | 0.2  | -0.4 | -0.7 | -0.7 | -0.6 | -0.9 | -0.7 | -0.1 |
| At2g42490 | Copper amine oxidase 3                          | CuAO3   | -0.3 | 0.1  | -0.1 | 0    | 0.2  | -0.2 | -0.4 | -0.4 | -0.1 |
| At1g54340 | NADP-dependent isocitrate deshydrogenase        | ICDH    | -0.1 | -0.4 | -0.7 | -0.7 | -0.1 | 0.2  | 0.1  | 0    | 0.1  |
| At5g11910 | Esterase/ lipase/ thioesterase family isoform 1 | ELT1    | -0.3 | -0.2 | -0.3 | -0.6 | -0.5 | -0.5 | -0.1 | 0    | 0.6  |
| At3g48140 | B12D-related protein                            | B12D1   | 0    | 0    | -1   | -2   | -5.6 | -3.6 | 0.7  | 1.4  | 1.8  |

| Number as | Developmental stage          |
|-----------|------------------------------|
| 1         | Seed stage 3 with siliques   |
| 2         | Seed stage 5 with siliques   |
| 3         | Seed stage 7 without silique |
| 4         | Seed stage 9 without silique |
| 5         | Dry seed                     |
| 6         | 3-h imbibed seed             |
| 7         | 6-h imbibed seed             |
| 8         | 12-h imbibed seed            |
| 9         | 24-h imbibed seed            |

**Supplemental Table S5.** Primers used for genotyping and RT-PCR analysis. P1 and P2 were used for RT-PCR; P3 and P4 were used for genotyping.

| Name      |        | Sequence                            |                        |
|-----------|--------|-------------------------------------|------------------------|
| LB_SALK   |        | ATTTTGCCGATTTTCGGAAC                |                        |
| LB_SAIL   |        | TAGCATCTGAATTTTCATAACCAATCTCGATACAC |                        |
| LB_GABI   |        | ATATTGACCATCATACTCATTGC             |                        |
| LB_Ws4    |        | CGTGTGCCAGGTGCCACGGAATAGT           |                        |
| At1g01710 | ACH2   | P1                                  | CGAGTTCCTTGGAAACGTCC   |
|           |        | P2/ P4.2                            | TCAGAGCTTCGACGTGCCGG   |
|           |        | P3.1                                | GATGTGGTTTTACCGACCTC   |
|           |        | P3.2                                | CACCATTATCTGCTACAGCTTC |
|           |        | P4.1                                | GATCCAAAATGGGTCTGACG   |
| At1g16730 | UP6    | P1/ P3                              | CATCACCGAATATCCGCCAC   |
|           |        | P2                                  | AGGTTTGGCGAGAGAGCTGA   |
|           |        | P4                                  | ACACATCTCAAGCTCTGATAC  |
| At1g19570 | DHAR1  | P1                                  | TCCTGATCATCTCGGCGACT   |
|           |        | P2                                  | TCAAGGGTTAACCTTGGGAG   |
|           |        | P3                                  | CTCTCTGACAAACCCAGTG    |
|           |        | P4                                  | GTCCTTGCCGAAGAGCGACT   |
| At1g20560 | AAE1   | P1/ P3                              | GCTCCGTCAAGTACACGTG    |
|           |        | P2/ P4                              | GCACTGGCCTTACACCCGTC   |
| At1g48320 | DHNAT1 | P1/ P3.1                            | GCATCGTCCAACACCAAAGC   |
|           |        | P2/ P4.1/ P4.2                      | CTTTGCGACCATTTTGAGCATG |
|           |        | P3.2                                | CTTTGGTCCGAAAGACTCTC   |
| At1g50510 | INDA   | P1                                  | ATGGCTTCTTCTTTAGCTCAAT |
|           |        | P2/ P4                              | CGTGCAAGTGATGTGCCTCC   |
|           |        | P3                                  | CGGTGCAACTACAGTCTCTG   |
| At1g54340 | ICDH   | P1                                  | ATGGAATTCGAGAAGATCAA   |
|           |        | P2                                  | TGGAGTTGTTGCCTAACAAATC |
|           |        | P3                                  | TCACTGCGGGGAATTCAAAG   |
|           |        | P4                                  | CGGACTAATCGTCGCACAC    |
| At1g64850 | CEF    | P1                                  | GAGTGGAGACATAAGCAGGT   |
|           |        | P2                                  | CATTACGTATTGACTAGATCC  |
|           |        | P3                                  | GCTCCATGTTTCTGTGGTATTC |
|           |        | P4                                  | GATCGAAATGAGGACCAGGC   |
| At1g77540 | ATF2   | P1                                  | ATGACGAACACGGCGGCGAC   |
|           |        | P2/ P4                              | CGTAGACTTGAATACCTCTG   |
|           |        | P3                                  | GCTCAATTGGCAGAGAGAAG   |
| At2g29590 | sT5    | P1                                  | GCAATTGAGCGATGAGGTGG   |
|           |        | P2/ P4                              | TCAGAGCTTACTAGCTTGTCT  |
|           |        | P3                                  | GTGGAGGAATCTGAGGAACA   |
| At2g42490 | CUAO3  | P1                                  | GCTGTCACTCGGGGTGGACA   |
|           |        | P2/ P4.1                            | ACCAGTCTGAAGAGCTTTCG   |
|           |        | P3.1                                | GACGAGCGAGGTGAGAACAA   |
|           |        | P3.2                                | GATTGGCCGTTATGCCCGT    |
|           |        | P4.2                                | CTGGTTCGTCCGAGTTGGAT   |
| At3g12800 | DECR   | P1/ P3.1                            | CTCTCCGTTCAAACCTGATG   |
|           |        | P2                                  | ACAGCTTGCTGGTTGGGAGAC  |
|           |        | P3.2                                | GCATTGGAGTGGGGAAGT     |
|           |        | P4.1                                | GGACCTGGAGCAATCCCGT    |
|           |        | P4.2                                | ATGAGAAAACAGAGAGGTGAC  |
| At3g14150 | HAOX2  | P1                                  | GGCTAAACAAGCCCTCCCTA   |
|           |        | P2                                  | GAAGTCTCTCATTCTCTGTCC  |
|           |        | P3                                  | GATTGCTTCCAGTTGTAACGC  |
|           |        | P4                                  | CTCAGGACAAAGGGGAGAGC   |
| At3g48140 | B12D1  | P1/ P3                              | ATGGCGAGCCGTTGGTTGAG   |
|           |        | P2/ P4                              | CAGTATGTAGGATCAGTGAAG  |
| At3g48170 | BADH   | P1/ P3                              | ATGGCGATTACGGTGCCGAGAC |
|           |        | P2                                  | CAGAGCTTGAAGGAGGTTTG   |
|           |        | P4                                  | ACGCCAATGGGTTCCCTTCAG  |
| At3g55640 | CADC   | P1/ P3.1                            | GCGTCGCAGCTCTTAGCC     |
|           |        | P2/ P4.2                            | GCAAATCCCTACACCAGGTAC  |
|           |        | P3.2                                | GGTGTGGGCCTAGTATTGC    |
|           |        | P4.1                                | CTGAGCAGCAAGACGAGTTC   |
| At3g56460 | ZNDH   | P1                                  | ATGGAGGCTTTGGTTGCGG    |

|           |              |          |                            |
|-----------|--------------|----------|----------------------------|
|           |              | P2       | CAGTCTTGTGGTCGAGAGCA       |
|           |              | P3       | TAAACGGCGTCGTATCAAATC      |
|           |              | P4       | TAAAGACCATGAACCGTCCAG      |
| At4g02340 | <i>EH3</i>   | P1       | ATGGAGAAGATAGAGCACAC       |
|           |              | P2       | TGTTCCGGCGATGATTAACA       |
|           |              | P3       | CTACAAGGATGCGGTTTCGC       |
|           |              | P4       | TGTTATGTCTAGATCACCAC       |
| At4g04320 | <i>MCD</i>   | P1       | GCAAGAAAAATCTAGCGATT       |
|           |              | P2/ P4.1 | TGCCTCCACTTTGACGAATAC      |
|           |              | P3.1     | ACCAGAGAACCAAGCAACATG      |
|           |              | P3.2     | TGAAGGAGAACTCGGTATGT       |
|           |              | P4.2     | GAGGGCATGTTCCCTTCTG        |
| At4g09320 | <i>NDPK1</i> | P1/ P3   | TTGCCTCCTACGAATCACAAG      |
|           |              | P2/ P4   | ATAGACCCAAGGGTGAACGC       |
| At5g04870 | <i>CPK1</i>  | P1       | CAAGCAGAAATGGCTTCTTGC      |
|           |              | P2       | CAGGTCTCCTGTGATGCTTC       |
|           |              | P3       | AGTTCCTCCATTCTGGGCTG       |
|           |              | P4       | GTGATATAGCCGCTCCCATC       |
| At5g11910 | <i>ELT1</i>  | P1/ P3   | ATGTCAGAGACTCGCCGAA        |
|           |              | P2       | CGCGATGTAATAGGAACAAC       |
|           |              | P4       | AAGTAGTCCTTACCAAGCCG       |
| At5g16370 | <i>AAE5</i>  | P1/ P3   | GCGCCGCAAACCTCGCCGCCG      |
|           |              | P2       | CGACTCAACCTCGTCGTACC       |
|           |              | P4       | CTGAAATTCGTTAGTCGCCG       |
| At5g44250 | <i>UP5</i>   | P1       | CAACGGAGGAGAAAGCGAAGC      |
|           |              | P2       | CTCTTCCCCGGTCTCCGCCT       |
|           |              | P3       | AAAACATCATCAAATAGTTACGGATG |
|           |              | P4       | AGGAACTGGCTTTGCTTTGAG      |
| At5g47720 | <i>AACT1</i> | P1       | ATGGCTCCGCCTGTCTCTGA       |
|           |              | P2       | TCAGAGTGCCGAATATCCGA       |
|           |              | P3       | CTACAGGTGGTAGCTCTAGC       |
|           |              | P4       | GCTGTGTCCGCTCCCTAGCC       |
| At5g58220 | <i>TTL</i>   | P1       | GAATGGAAGGTTTGCTGTGG       |
|           |              | P2/ P4   | CTAGCTCCCACGGTATGTGG       |
|           |              | P3       | ACAGCTCTAGCTCTCCT          |
| At5g65400 | <i>UP7</i>   | P1       | ATGTTAGGATACTCCTATCC       |
|           |              | P2/ P4.1 | AGAAAGCATCTGCCTAATGCT      |
|           |              | P3.1     | CTGCAGCTATTCTGGAATG        |
|           |              | P3.2     | CAGTCAAAATTGCCGAAAGAC      |
|           |              | P4.2     | CGCCAAAGAATCAAACAAC        |
